# Supplementary material
Source: PubMed Central journal article supplement (PMC1450186)

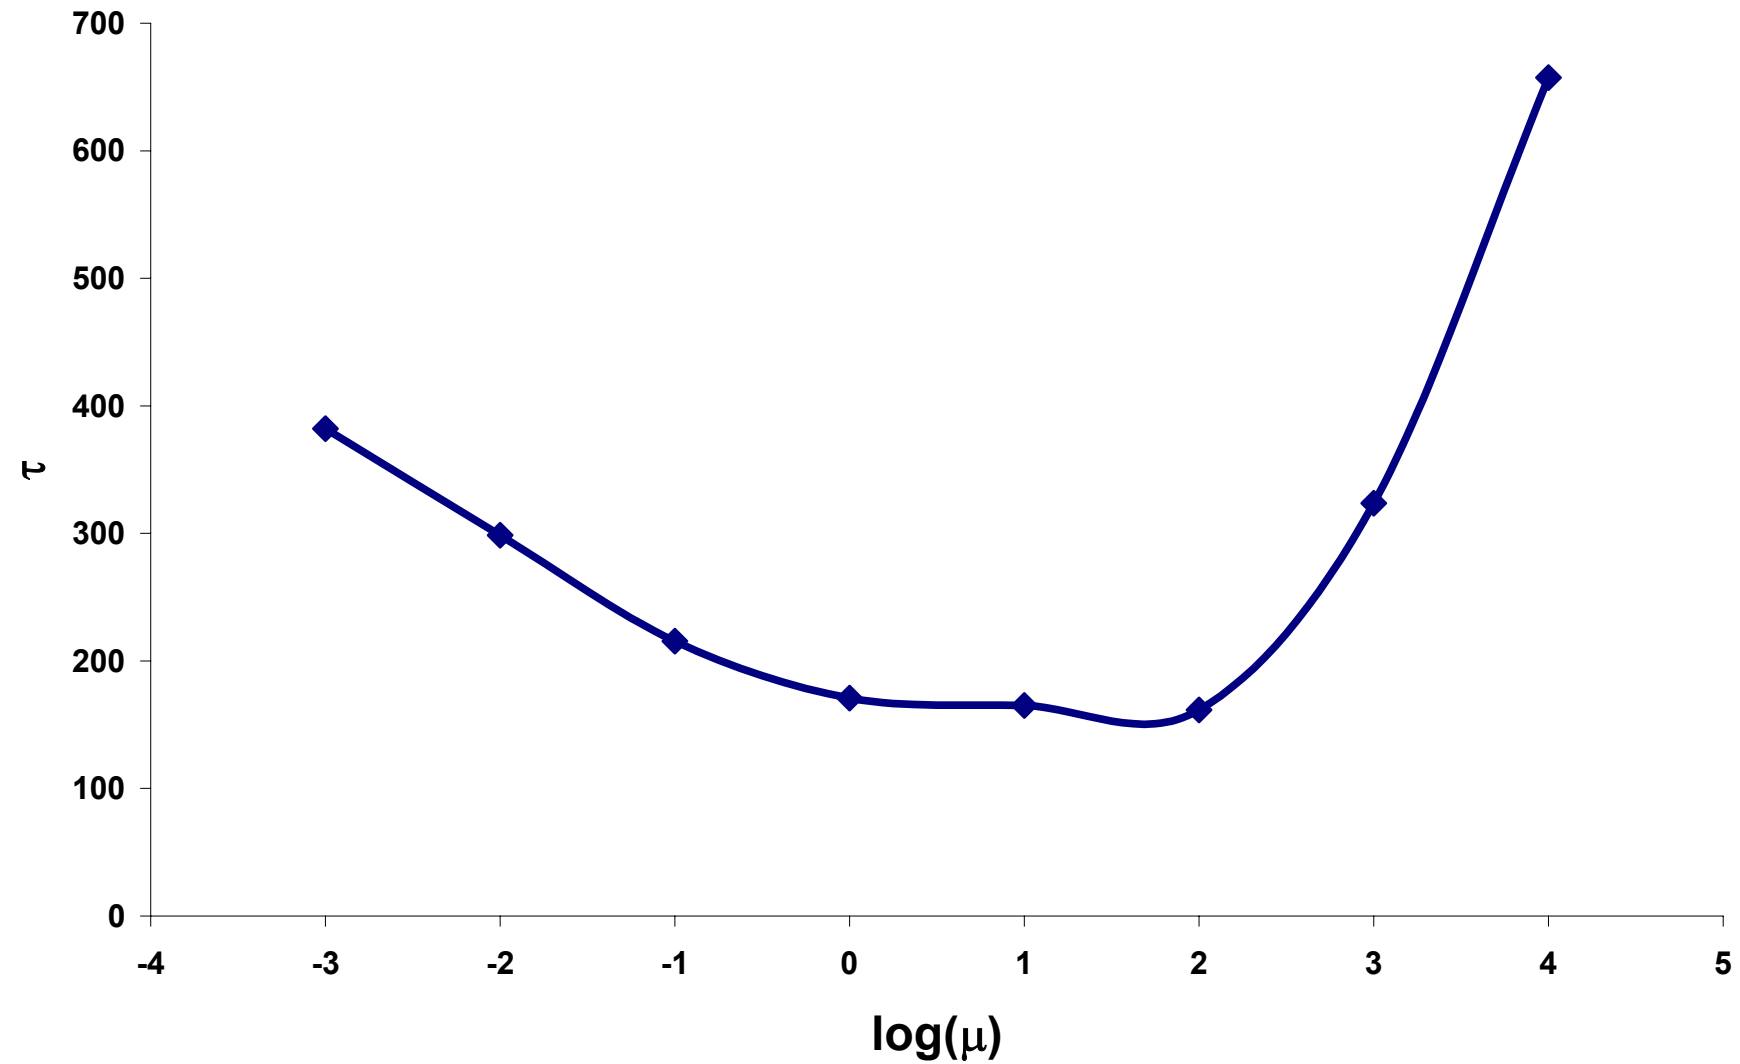

Supplement: pnas_0510991103_1.pdf [file pnas_0510991103_1.pdf]
